# Supplementary material for: Mouse intestinal tuft cells express advillin but not villin
Source: PubMed Central journal article supplement (PMC7264147; doi:10.1038/s41598-020-65469-0), 2020-06-01

## Supplementary Data

### *Mouse intestinal tuft cells express advillin but not villin.*

Amin Esmaeilniakooshkghazi, Sudeep P. George, Ritwika Biswas and Seema Khurana.

**Figure S1. Western analysis using recombinant human villin and advillin proteins (full-length data for Figure 1a).**

**a**, N-Advillin antibody has higher specificity for advillin than villin. **b**, C-Advillin antibody has higher specificity for advillin than villin. **c**, N-Villin antibody recognizes villin and not advillin. **d**, N20-Villin antibody recognizes villin and not advillin. **e**, C-Villin antibody recognizes both villin and advillin. **f**, Full-length villin antibody recognizes both villin and advillin.

**Figure S2. Western analysis of distal ileal tissue from VKO mice show the absence of villin (full-length data for Figure 1e).**

**a**, N-villin antibody shows the absence of villin in VKO mice. **b**, Actin antibody used as a positive control.

**Figure S1**

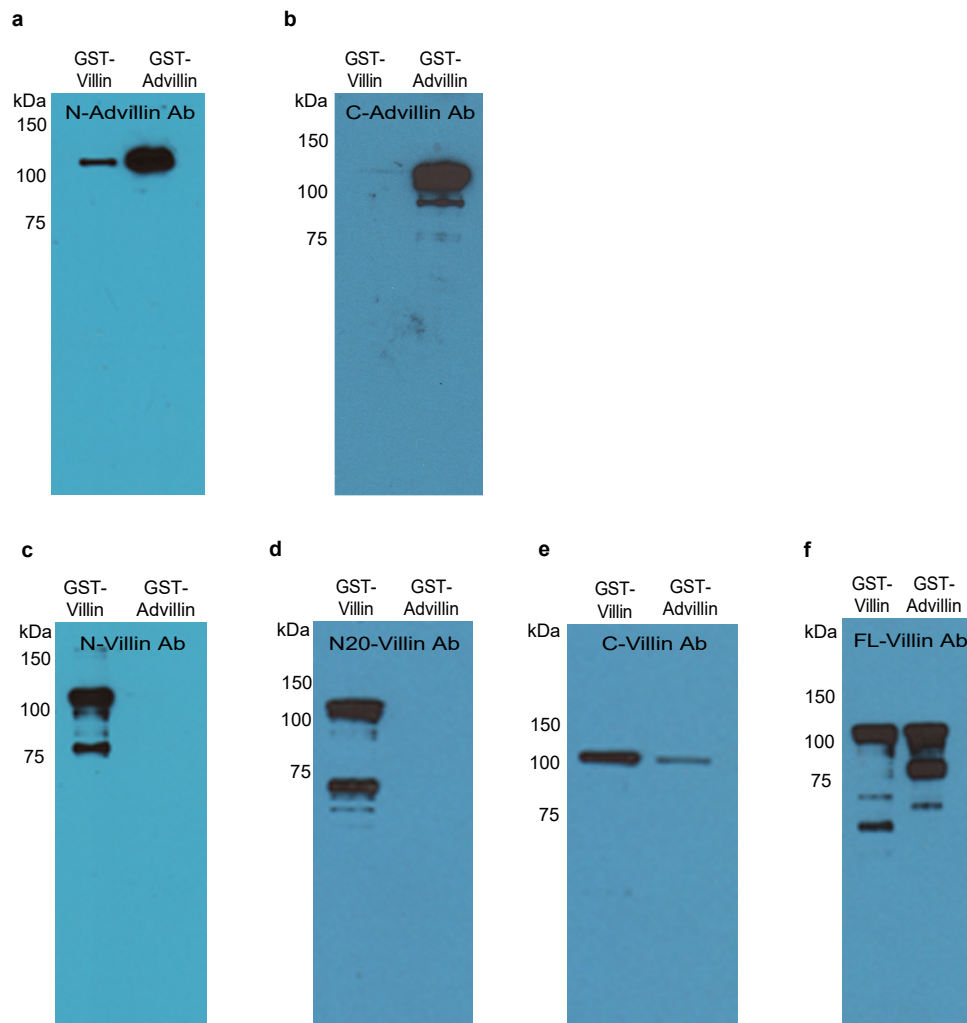

**Figure S2**

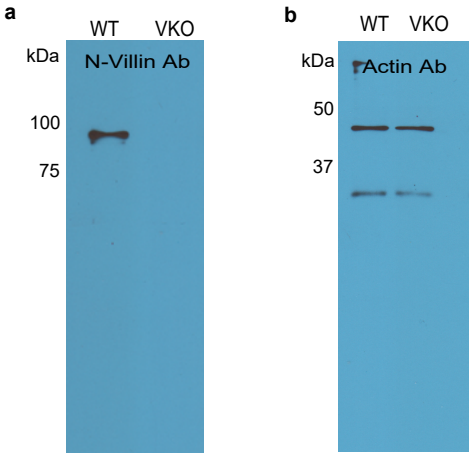

Supplement: 41598_2020_65469_MOESM1_ESM.pdf [file 41598_2020_65469_MOESM1_ESM.pdf]
